# Supplementary material for: Genomic Profiling of Collaborative Cross Founder Mice Infected with Respiratory Viruses Reveals Novel Transcripts and Infection-Related Strain-Specific Gene and Isoform Expression
Source: PubMed Central journal article supplement (PMC4132174; doi:10.1534/g3.114.011759), 2014-06-05
Supplement: supp_g3.114.011759_FigureS2.pdf [file supp_g3.114.011759_FigureS2.pdf]

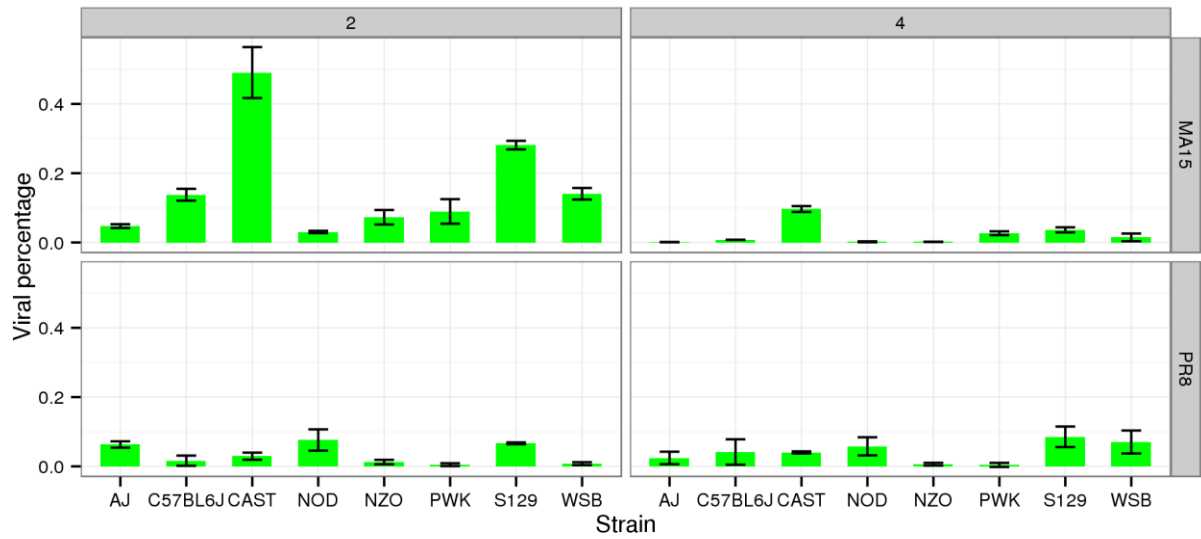

**Figure S2 The percentage of RNA reads that belong to MA15 or PR8 genomes.** The percentages were calculated by summing all viral reads from animals infected with one virus type for each founder strain at different time points (2 and 4 days post infection) and divided by the total read counts. Each strain had at least two replicates and most have three replicates. There are clear strain-specific differences in the viral read percentages, ranging from almost zero percent of RNA reads in MA15-infected AJ mice to close to half of reads in MA15-infected CAST mice on day 2 post infection.
