# Supplementary material for: Genomic Profiling of Collaborative Cross Founder Mice Infected with Respiratory Viruses Reveals Novel Transcripts and Infection-Related Strain-Specific Gene and Isoform Expression
Source: PubMed Central journal article supplement (PMC4132174; doi:10.1534/g3.114.011759), 2014-06-05
Supplement: supp_g3.114.011759_FigureS11.pdf [file supp_g3.114.011759_FigureS11.pdf]

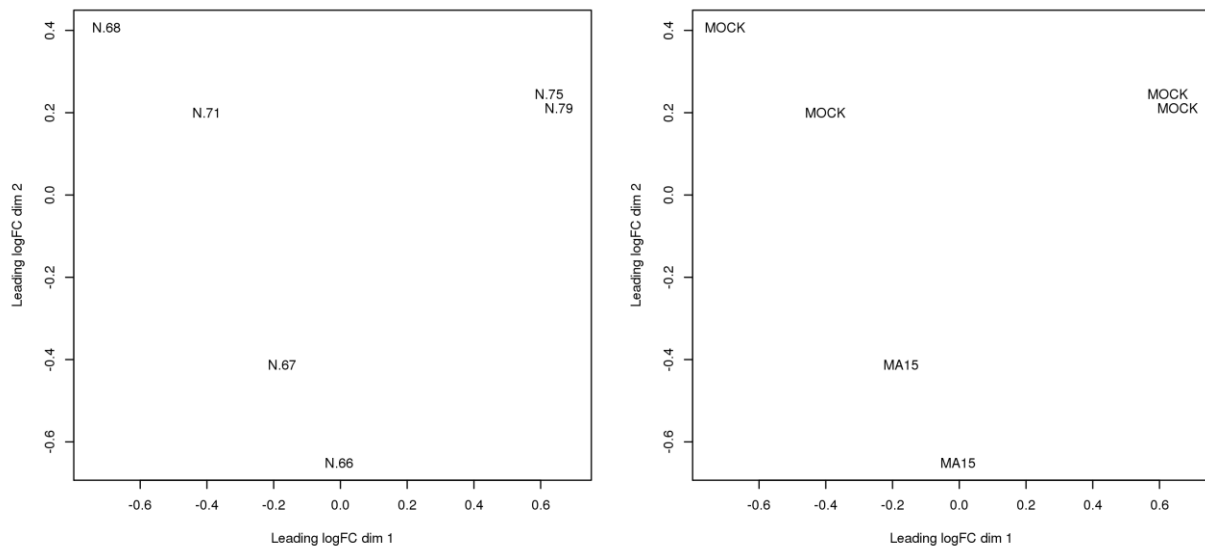

**Figure S11** The MDS plot of six samples for AJ strain infected with MA15 at day 2 post infection. The two subplots have different text but are based on the same data. MDS plot is used to gauge possible batch-effect and separation between mocks and infected samples, which are well separated.
