# Supplementary material for: Genomic Profiling of Collaborative Cross Founder Mice Infected with Respiratory Viruses Reveals Novel Transcripts and Infection-Related Strain-Specific Gene and Isoform Expression
Source: PubMed Central journal article supplement (PMC4132174; doi:10.1534/g3.114.011759), 2014-06-05
Supplement: supp_g3.114.011759_TableS1.pdf [file supp_g3.114.011759_TableS1.pdf]

**Table S1** The number of splice junctions that were discovered in one strain but not in another strain. One strain (in the row heading) is compared to another strain (in the column heading). For example, there are 3515 junctions in 129S1 that are absent from AJ.

|              | <b>129S1</b> | <b>AJ</b> | <b>B6</b> | <b>CAST</b> | <b>NOD</b> | <b>NZO</b> | <b>PWK</b> | <b>WSB</b> |
|--------------|--------------|-----------|-----------|-------------|------------|------------|------------|------------|
| <b>129S1</b> | 0            | 3515      | 10824     | 14581       | 3279       | 7901       | 8250       | 7576       |
| <b>AJ</b>    | 6507         | 0         | 13508     | 17474       | 4980       | 9888       | 9294       | 9925       |
| <b>B6</b>    | 1421         | 1113      | 0         | 7877        | 974        | 2526       | 4363       | 2976       |
| <b>CAST</b>  | 3156         | 3057      | 5855      | 0           | 2957       | 4556       | 4746       | 4101       |
| <b>NOD</b>   | 5309         | 4018      | 12407     | 16412       | 0          | 8954       | 9255       | 9108       |
| <b>NZO</b>   | 3187         | 2182      | 7215      | 11267       | 2210       | 0          | 7140       | 5255       |
| <b>PWK</b>   | 11641        | 9693      | 17157     | 19562       | 10616      | 15245      | 0          | 14535      |
| <b>WSB</b>   | 3154         | 2511      | 7957      | 11104       | 2656       | 5547       | 6722       | 0          |
