# Supplementary material for: Genomic Profiling of Collaborative Cross Founder Mice Infected with Respiratory Viruses Reveals Novel Transcripts and Infection-Related Strain-Specific Gene and Isoform Expression
Source: PubMed Central journal article supplement (PMC4132174; doi:10.1534/g3.114.011759), 2014-06-05
Supplement: supp_g3.114.011759_TableS3.pdf [file supp_g3.114.011759_TableS3.pdf]

**Table S3 The number of differentially expressed splicing junctions.** Here a DE junction must be outside DE genes to disambiguate isoform DE from gene DE. There is one order of magnitude of difference between different strains or time points. We took a decidedly conservative approach. There likely are more differentially expressed splicing junctions than we found.

| Strain       | MA15  |       | PR8   |       |
|--------------|-------|-------|-------|-------|
|              | Day 2 | Day 4 | Day 2 | Day 4 |
| <b>129S1</b> | 453   | 326   | 219   | 720   |
| <b>AJ</b>    | 25    | 237   | 306   | 174   |
| <b>B6</b>    | 817   | 183   | 42    | 628   |
| <b>CAST</b>  | 855   | 581   | 192   | 783   |
| <b>NOD</b>   | 206   | 282   | 521   | 438   |
| <b>NZO</b>   | 612   | 184   | 101   | 268   |
| <b>PWK</b>   | 692   | 976   | 64    | 235   |
| <b>WSB</b>   | 964   | 276   | 75    | 822   |
