# Supplementary material for: Genomic Profiling of Collaborative Cross Founder Mice Infected with Respiratory Viruses Reveals Novel Transcripts and Infection-Related Strain-Specific Gene and Isoform Expression
Source: PubMed Central journal article supplement (PMC4132174; doi:10.1534/g3.114.011759), 2014-06-05
Supplement: supp_g3.114.011759_TableS4.pdf [file supp_g3.114.011759_TableS4.pdf]

**Table S4** The replicate size for each combination of mouse strain, virus, and days-post-infection. Note that mocks are pooled for all DE analysis.

| <b>Strain</b> | <b>Virus</b> | <b>Day</b> | <b>Sample size</b> |
|---------------|--------------|------------|--------------------|
| <b>129S1</b>  | MA15         | 2          | 3                  |
| <b>129S1</b>  | MA15         | 4          | 3                  |
| <b>129S1</b>  | MOCK         | 2          | 2                  |
| <b>129S1</b>  | MOCK         | 4          | 2                  |
| <b>129S1</b>  | PR8          | 2          | 3                  |
| <b>129S1</b>  | PR8          | 4          | 3                  |
| <b>AJ</b>     | MA15         | 2          | 3                  |
| <b>AJ</b>     | MA15         | 4          | 2                  |
| <b>AJ</b>     | MOCK         | 2          | 2                  |
| <b>AJ</b>     | MOCK         | 4          | 2                  |
| <b>AJ</b>     | PR8          | 2          | 3                  |
| <b>AJ</b>     | PR8          | 4          | 3                  |
| <b>B6</b>     | MA15         | 2          | 3                  |
| <b>B6</b>     | MA15         | 4          | 3                  |
| <b>B6</b>     | MOCK         | 2          | 2                  |
| <b>B6</b>     | MOCK         | 4          | 2                  |
| <b>B6</b>     | PR8          | 2          | 2                  |
| <b>B6</b>     | PR8          | 4          | 3                  |
| <b>CAST</b>   | MA15         | 2          | 3                  |
| <b>CAST</b>   | MA15         | 4          | 2                  |
| <b>CAST</b>   | MOCK         | 2          | 2                  |
| <b>CAST</b>   | MOCK         | 4          | 2                  |
| <b>CAST</b>   | PR8          | 2          | 3                  |
| <b>CAST</b>   | PR8          | 4          | 2                  |
| <b>NOD</b>    | MA15         | 2          | 3                  |
| <b>NOD</b>    | MA15         | 4          | 3                  |
| <b>NOD</b>    | MOCK         | 2          | 2                  |
| <b>NOD</b>    | MOCK         | 4          | 2                  |
| <b>NOD</b>    | PR8          | 2          | 3                  |
| <b>NOD</b>    | PR8          | 4          | 3                  |
| <b>NZO</b>    | MA15         | 2          | 2                  |
| <b>NZO</b>    | MA15         | 4          | 2                  |
| <b>NZO</b>    | MOCK         | 2          | 2                  |
| <b>NZO</b>    | MOCK         | 4          | 2                  |
| <b>NZO</b>    | PR8          | 2          | 2                  |
| <b>NZO</b>    | PR8          | 4          | 2                  |
| <b>PWK</b>    | MA15         | 2          | 3                  |
| <b>PWK</b>    | MA15         | 4          | 3                  |
| <b>PWK</b>    | MOCK         | 2          | 2                  |

---

|            |      |   |   |
|------------|------|---|---|
| <b>PWK</b> | MOCK | 4 | 2 |
| <b>PWK</b> | PR8  | 2 | 2 |
| <b>PWK</b> | PR8  | 4 | 3 |
| <b>WSB</b> | MA15 | 2 | 3 |
| <b>WSB</b> | MA15 | 4 | 3 |
| <b>WSB</b> | MOCK | 2 | 2 |
| <b>WSB</b> | MOCK | 4 | 2 |
| <b>WSB</b> | PR8  | 2 | 3 |
| <b>WSB</b> | PR8  | 4 | 3 |

---
