# Supplementary material for: Genomic Profiling of Collaborative Cross Founder Mice Infected with Respiratory Viruses Reveals Novel Transcripts and Infection-Related Strain-Specific Gene and Isoform Expression
Source: PubMed Central journal article supplement (PMC4132174; doi:10.1534/g3.114.011759), 2014-06-05
Supplement: supp_g3.114.011759_TableS5.pdf [file supp_g3.114.011759_TableS5.pdf]

**Table S5 Viral read counts in the mock-infected founders.** Each strain's total comes from four mice. The counts are low, several orders of magnitude lower than infected samples. The fact we still get non-zero reads may be an artifact of mapping and select strains may have partial sequence similarity to viruses.

| <b>Strain</b> | <b>MA15</b> | <b>PR8</b> |
|---------------|-------------|------------|
| <b>129S1</b>  | 5084        | 11394      |
| <b>AJ</b>     | 9549        | 2659       |
| <b>B6</b>     | 521         | 1656       |
| <b>CAST</b>   | 10490       | 3060       |
| <b>NOD</b>    | 608         | 857        |
| <b>NZO</b>    | 629         | 636        |
| <b>PWK</b>    | 957         | 634        |
| <b>WSB</b>    | 144         | 7491       |
